# Supplementary material for: Know What You Don’t Know: Assessment of Overlooked Microplastic Particles in FTIR Images
Source: MDPI journal article supplement (doi:10.3390/microplastics1030027), 2022-07-14
Supplement: s1 [file s1]

## S1. Assembly of RefIMP

Tiles containing few particles (< 20), blurred areas or high background noise were excluded as far as possible. The most suitable tiles were collected in a folder and renamed systematically to build up the reference image. Care was taken to avoid the separation of tiles that were connected to each other in the original images. The re-named tiles were converted from the Agilent-specific format \*.dmd to \*.wno and \*.spe using siMPle (<https://simple-plastics.eu>).

Single tiles can be replaced or another reference image can be built similarly.

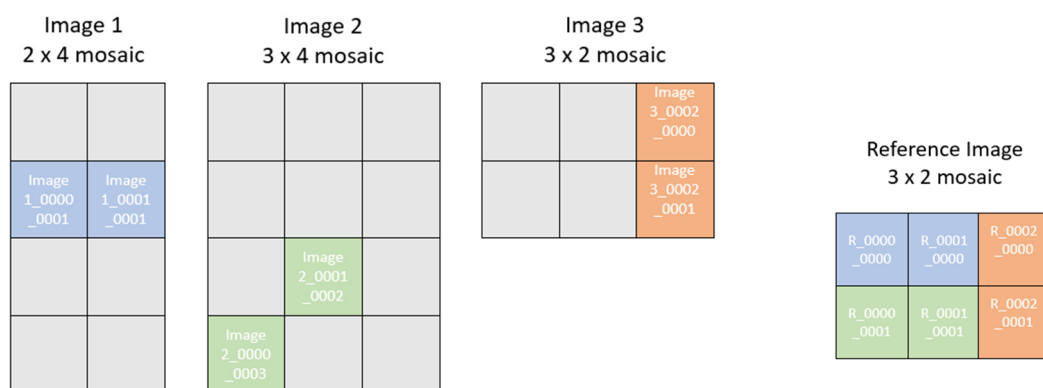

Figure S1. Assembly of RefIMP from single tiles

## S2. Ground truth for RefIMP

Through a combination of manual evaluation and classification with a Random Decision Forest Model, the ground truth for RefIMP was established. Particle types present as well as their larger Feret diameters in  $\mu\text{m}$  are shown below:

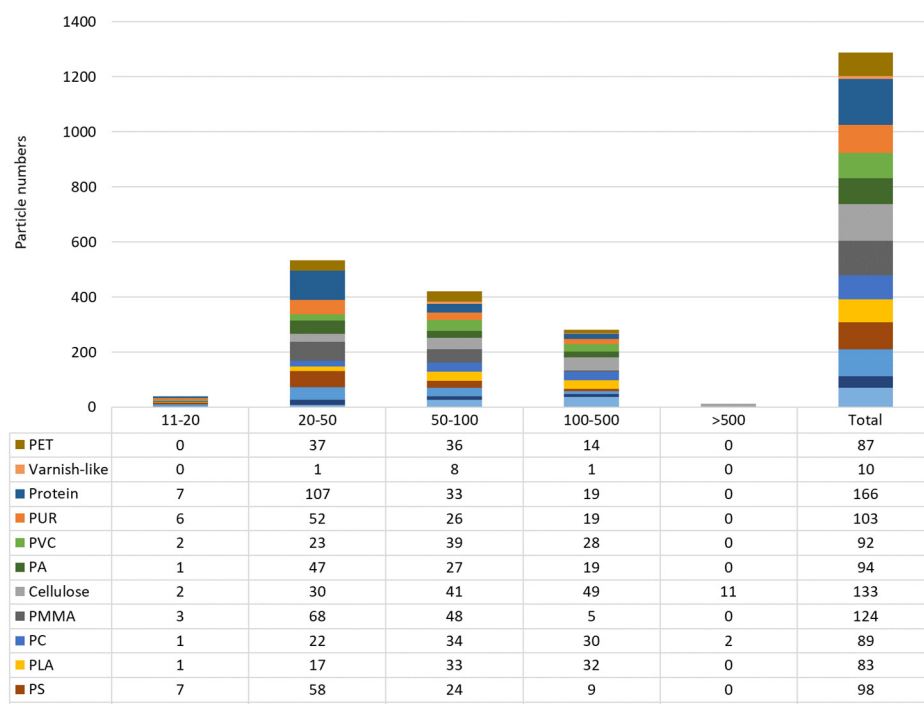

Figure S2. Plastic types and size distributions of MP particles in RefIMP

### S3. Assignment of found particles to reference particles

Sketches of assignment of found particles to reference particles using the reference particles' bounding boxes and the found particles' centers

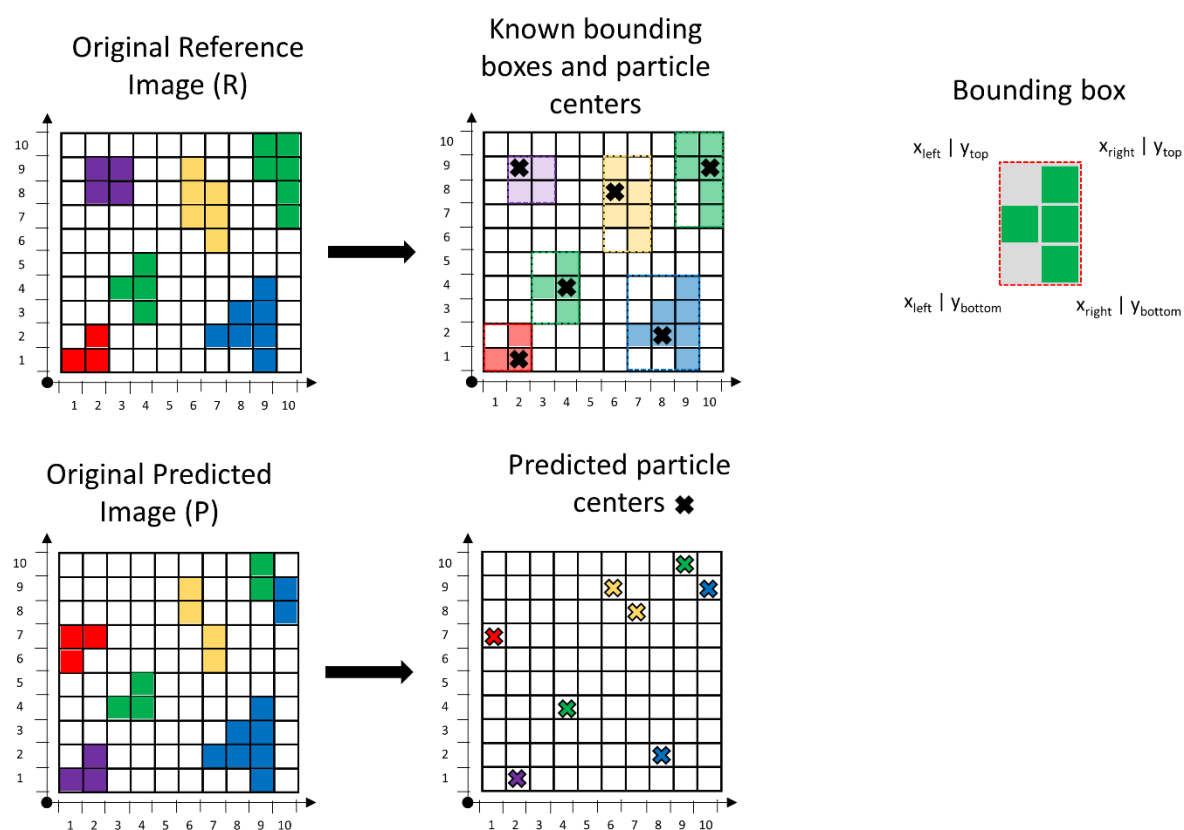

Figure S3. Illustration of assignment of found particles to reference particles

### S4. PCA-based background masking

Score plot for PC1 vs. PC5 of RefIMP

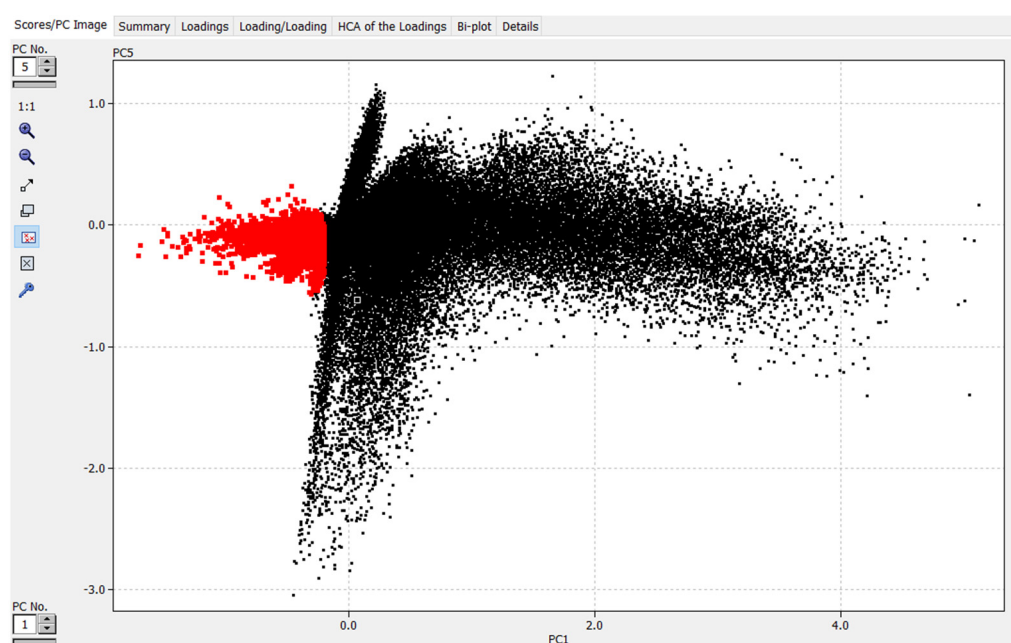

Figure S4. PCA for background pixel masking

## S5. Reference spectra

For each class, ten 'good looking' spectra were chosen, normalized [0 1] and averaged (black lines in diagrams, grey lines are the corresponding standard deviations). The average spectra served as references for the respective classes. Note that the Anodisc spectrum appears to not be representing a baseline because of the normalization process.

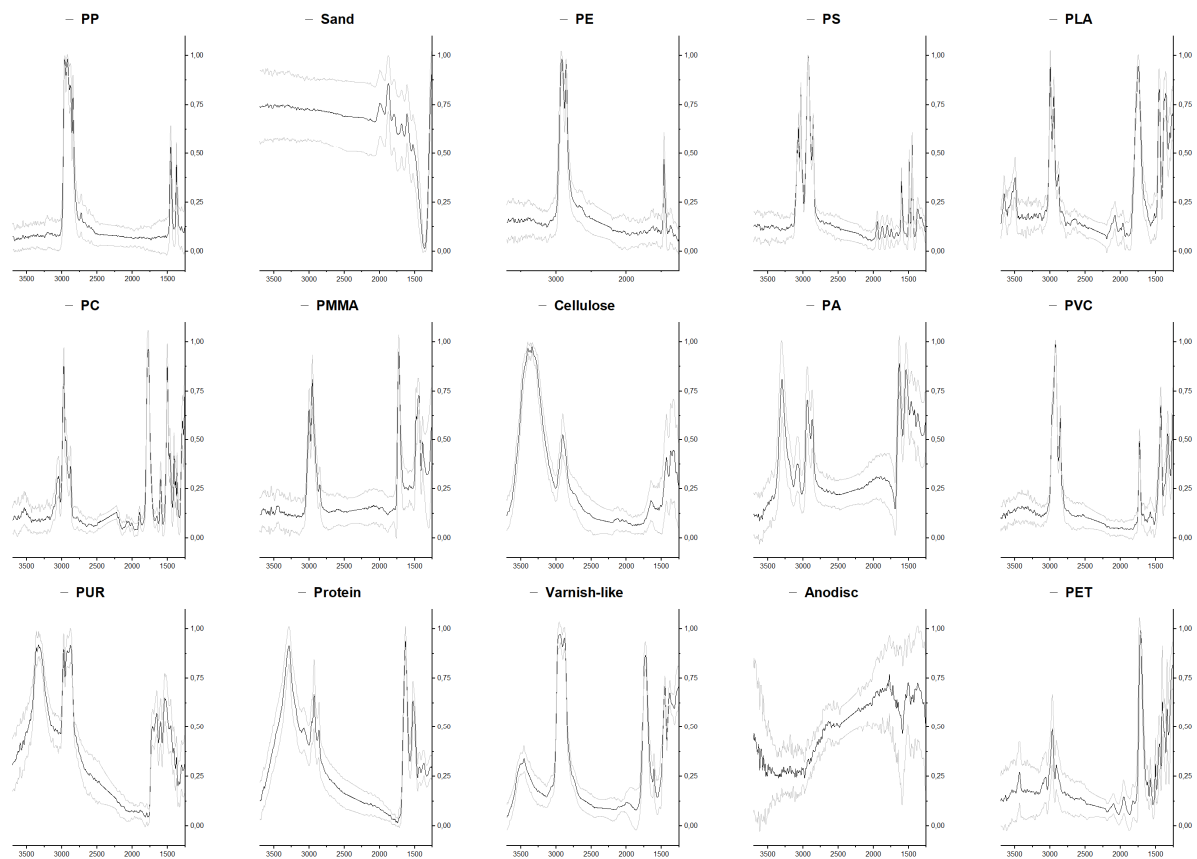

Figure S5. Mean reference spectra with standard deviations

## S6. Detailed results from RDF hyperparameter tuning

### a. Influence of minimum neighboring correlation

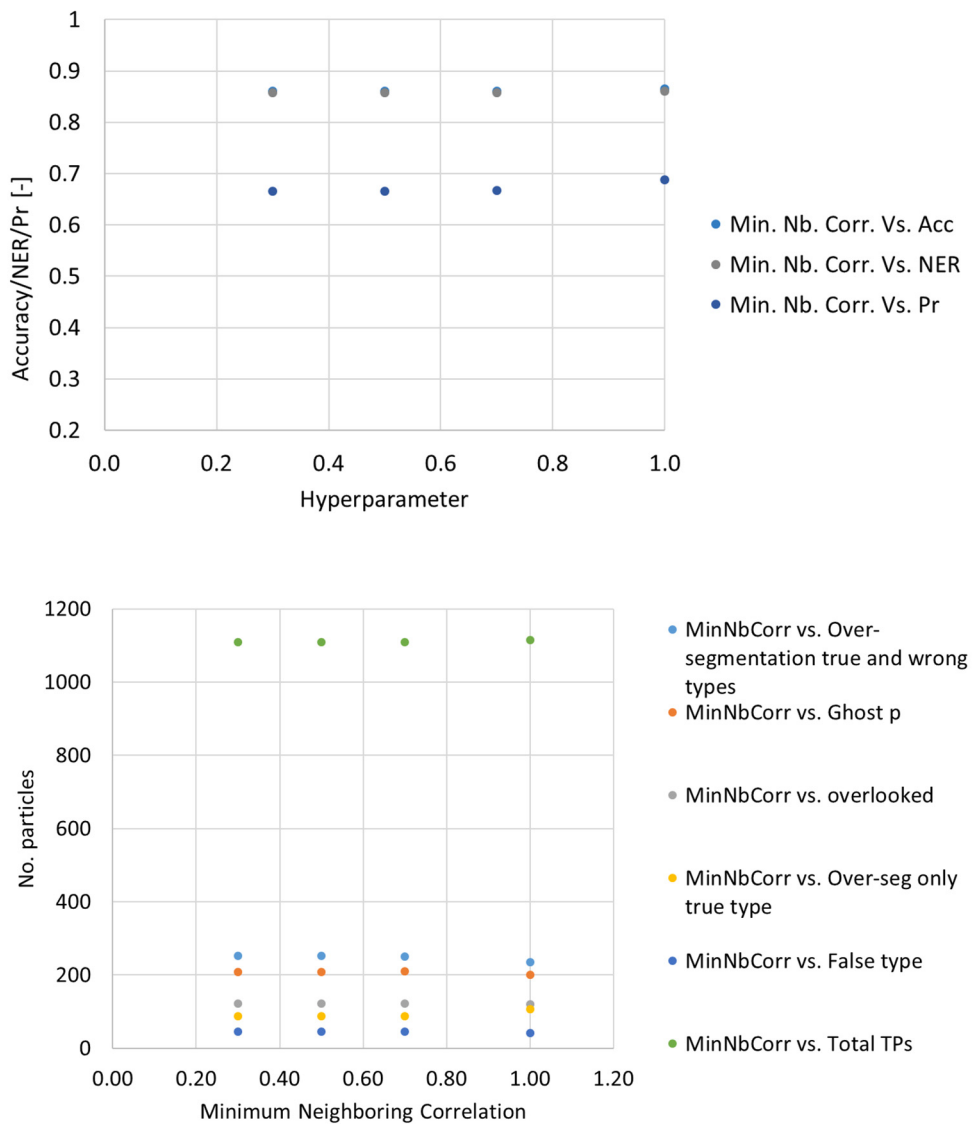

Figure S6. Influence of minimum neighboring correlation on predictions

### b. Influence of minimum purity

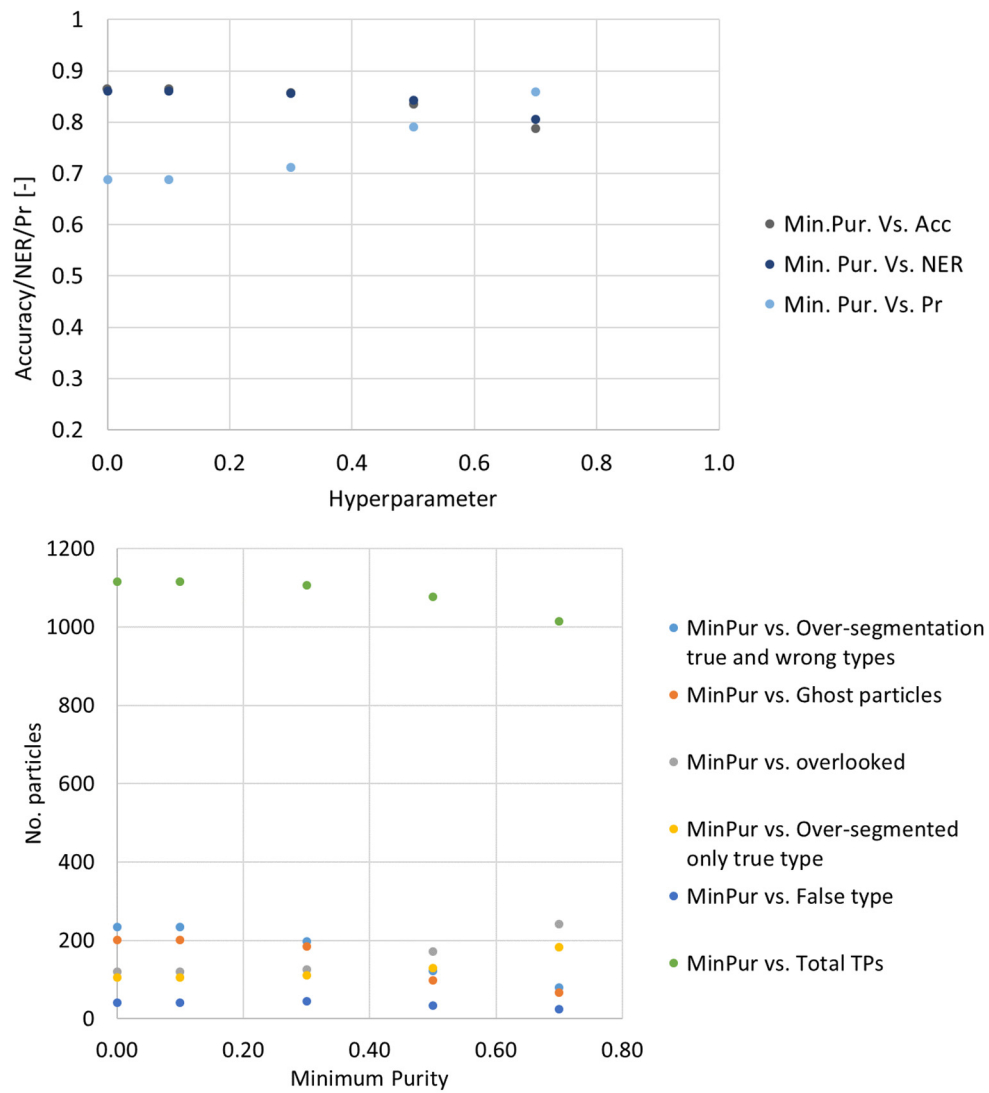

Figure S7. Influence of minimum purity on predictions

### c. Influence of minimum distance

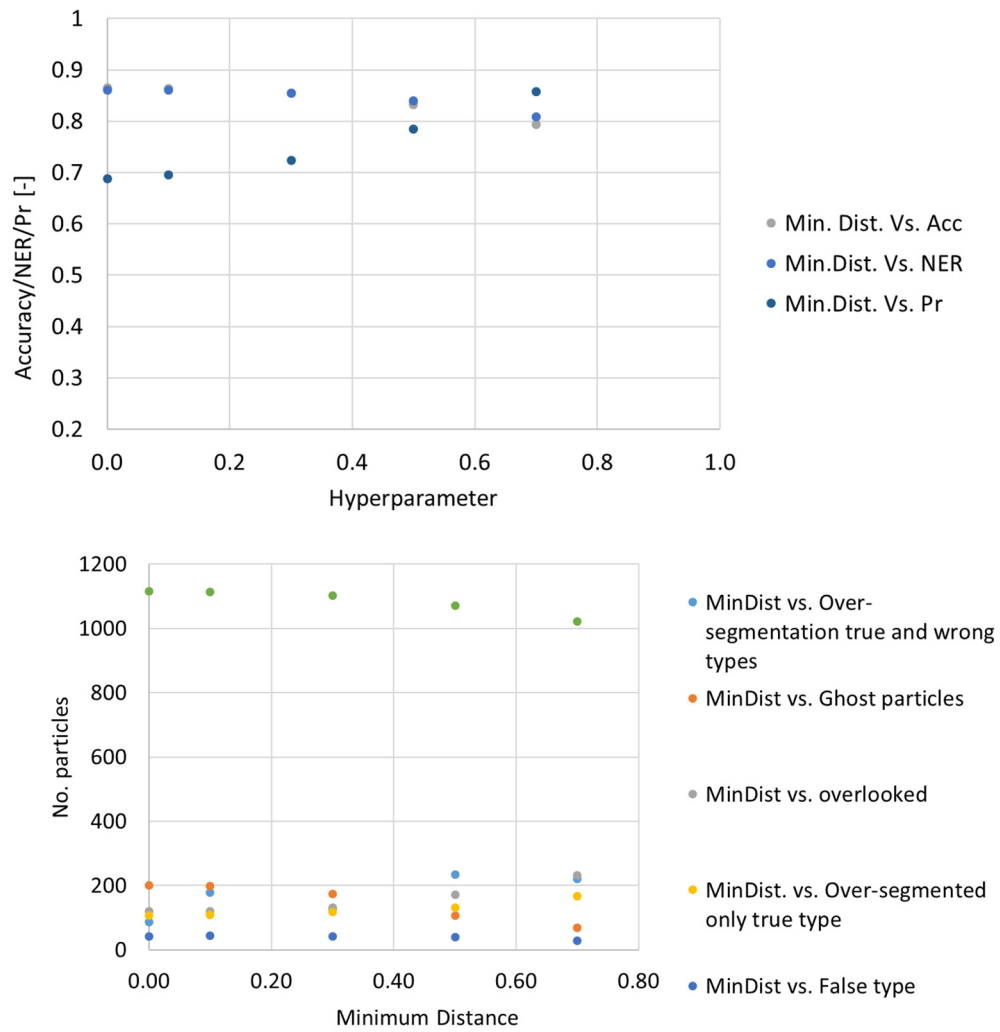

Figure S8. Influence of minimum distance on predictions

d. Influence of classification threshold

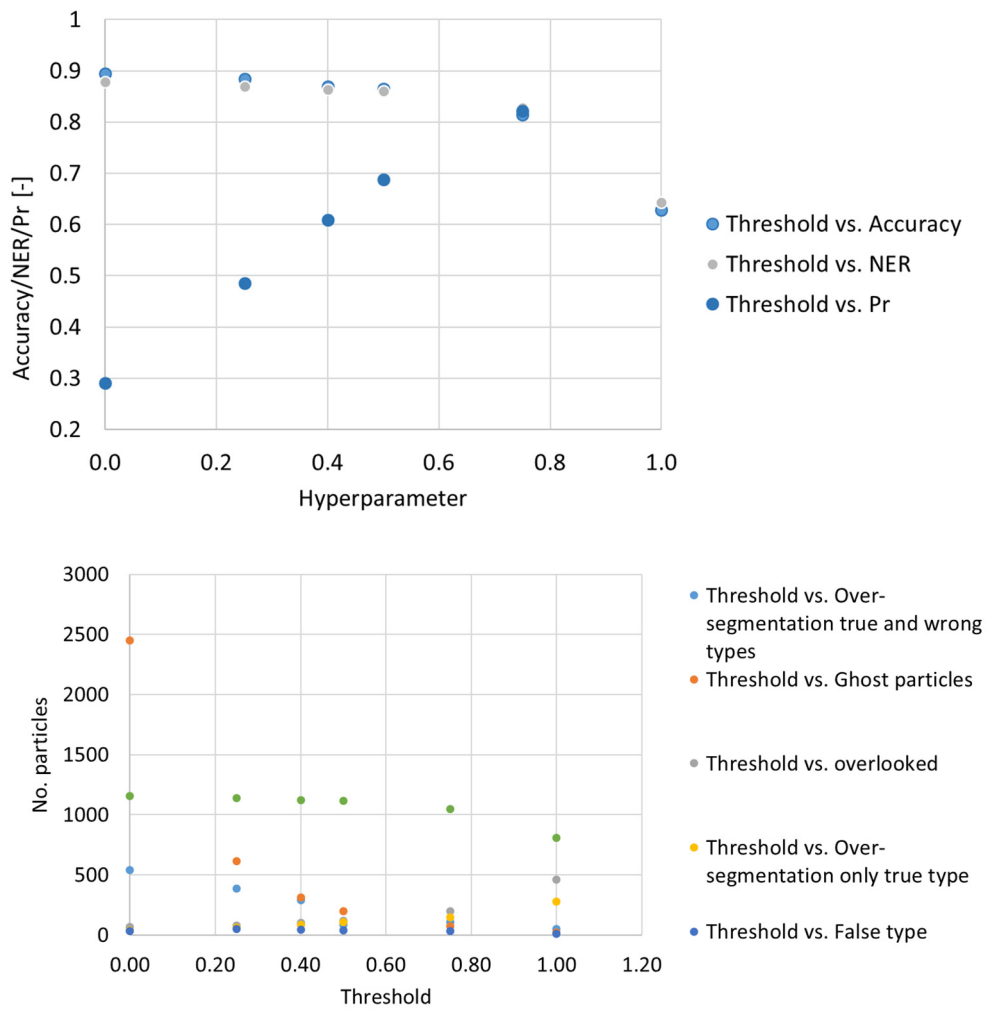

Figure S9. Influence of classification threshold on prediction
